# Supplementary material for: Thermal approaches based on microwaves to recover lithium from spent lithium-ion batteries
Source: Royal Society of Chemistry journal article supplement (doi:10.1039/d4su00202d), 2024-01-01
Supplement: d4su00202d1.pdf [file d4su00202d1.pdf]

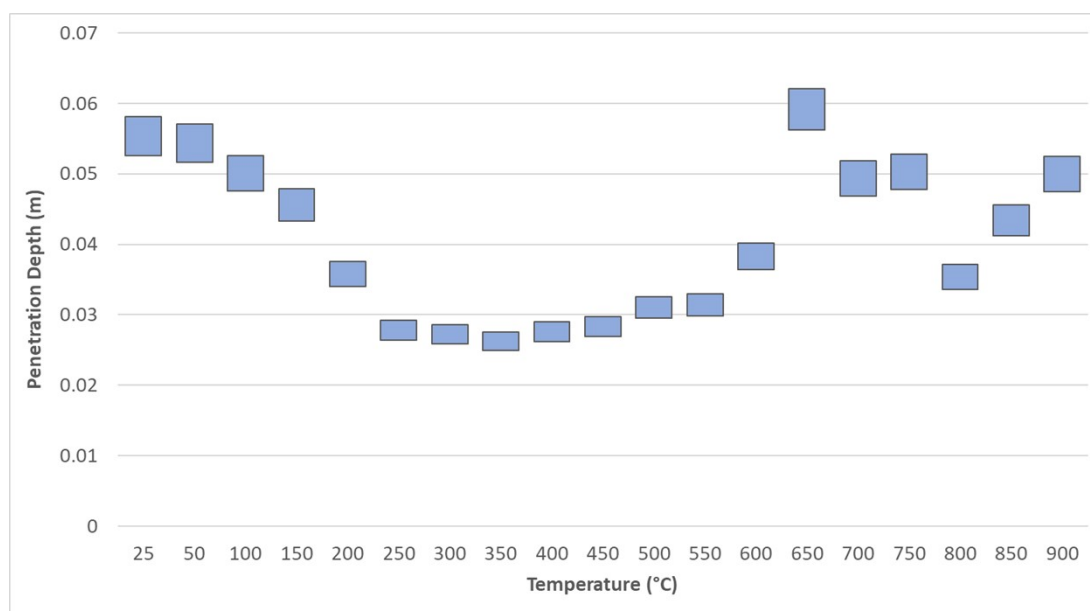

Fig. S1: Interval of MW penetration depth calculated for a spent LCO battery BM, containing 20% of graphite. Each blue rectangle represents an interval, showing the variability in the MW penetration depth for each temperature, depending on the BM density and dielectric parameters.
